# Supplementary material for: Coordination environment evolution of Co(ii) during dehydration and re-crystallization processes of KCoPO4·H2O towards enhanced electrocatalytic oxygen evolution reaction
Source: Royal Society of Chemistry journal article supplement (doi:10.1039/d0ra01813a), 2020-01-01
Supplement: d0ra01813a1.pdf [file d0ra01813a1.pdf]

## Electronic Supplementary Information

### Coordination environment evolution of Co (II) during dehydration and re-crystallization processes of $\text{KCoPO}_4 \cdot \text{H}_2\text{O}$ towards enhanced electrocatalytic oxygen evolution reaction

Quande Che,<sup>\*a</sup> Xiaobin Xie,<sup>b</sup> Qian Ma,<sup>a</sup> Junpeng Wang,<sup>a</sup> Yuanna Zhu,<sup>a</sup> Ruixia Shi,<sup>a</sup>

Ping Yang<sup>\*a</sup>

<sup>a</sup> School of Materials Science and Engineering, University of Jinan, Jinan 250022, P. R. China.

E-mail: mse\_cheqd@ujn.edu.cn, mse\_yangp@ujn.edu.cn

Tel.: +86 531 89736225; fax: +86 531 87974453

<sup>b</sup> School of Materials Science and Engineering, Wuhan University of Technology, Wuhan 430070, P. R. China.

#### 1. Experimental

##### 1.1 Materials

All reagents were used without further purification. Cobalt chloride ( $\text{CoCl}_2 \cdot 6\text{H}_2\text{O}$ , 98%), dipotassium hydrogenphosphate ( $\text{K}_2\text{HPO}_4$ ,  $\geq 98.0\%$ ), potassium hydroxide ( $\text{KOH}$ ,  $\geq 85.0$  wt%) were purchased from Sinopharm Chemical Reagent Co. Ltd. Nafion solution (10 wt%) was purchased from Sigma-Aldrich Co. LLC. The DI water (resistance of  $18.2 \text{ M}\Omega \text{ cm} / 25 \text{ }^\circ\text{C}$ ) used in experiments was obtained from the Milli-Q system.

##### 1.2 Characterization

Morphology and crystal structure studies were performed on the as-prepared  $\text{KCoPO}_4 \cdot \text{H}_2\text{O}$  and  $\text{KCoPO}_4$  samples using a field-emission scanning electron microscope (SEM, FEI, Quanta 250, the United States), X-ray diffraction

(XRD, D8 Advance Bruker), transmission electron microscope (TEM, Tecnai G2 F20, FEI), X-ray photoelectron spectroscopy (XPS, Thermo Scientific ESCALab 250Xi), and TGA thermogravimetric simultaneous thermal analyzer (STA8000).

### 1.3 Electrochemical measurements

All the electrocatalytic measurements were carried out on a PARSTAT4000+ electrochemical workstation in 1M KOH aqueous solution via a three-electrode configuration at room temperature. Catalyst powder was well dispersed in a mixture of isopropanol, water Nafion solution (10 wt%). Then, the ink was spread onto the surface of the glassy carbon electrode (mass loading:  $\sim 0.2 \text{ mg cm}^{-2}$ ) by a micropipette and dried under room temperature. The as-prepared  $\text{KCoPO}_4 \cdot \text{H}_2\text{O}$  and  $\text{KCoPO}_4$  were used as the working electrode. The Hg/HgO electrode and a platinum plate were used as the reference electrode and the counter electrode, respectively. The linear sweep voltammetry (LSV) measurements were carried out on a scan rate of  $5 \text{ mV s}^{-1}$ , with the iR compensation using the equation:  $E_{iR \text{ corrected}} = E - iR_s$ , where  $R_s$  is the uncompensated ohmic solution resistance. Electrochemical impedance spectroscopy (EIS) tests were conducted with the frequency scan range from 10 kHz to 0.1Hz. Besides, all potentials in this research were reported versus the reversible hydrogen electrode (RHE), converted using the following equation:

$$E_{\text{RHE}} = E_{\text{Hg/HgO}} + 0.098 + 0.059 \times \text{pH}$$

where  $E_{\text{Hg/HgO}}$  is the tested potential against the reference electrode.

In addition, the turnover frequency (TOF) was calculated according to the following equation<sup>1</sup>:

$$\text{TOF} = \frac{j \times A}{4 \times F \times n}$$

where  $j$  is the current density obtained at overpotential of 400 mV in  $\text{A cm}^{-2}$ ,  $A$  is the surface area of the electrode ( $0.0706 \text{ cm}^2$ ),  $F$  is the constant ( $96485.3 \text{ C mol}^{-1}$ ), and  $n$  is the moles of the catalyst loaded on the electrode.

## 2. Computational models and methods.

The computational calculations were performed with CASTEP module of the Materials Studio,<sup>2</sup> which is based on the density functional theory (DFT),<sup>3,4</sup> with the Hubbard model (DFT + U).<sup>5,6</sup> For a better description of the Co (3d) electrons, the effective U value of 3.3 eV was applied. A kinetic energy cut-off of 520 eV was used. The electronic wave function was expressed by the combination of plane wave basis, and the generalized gradient approximation (GGA) method with the Perdew-Burke-Ernzerhof (PBE) functional<sup>7,8</sup> was employed for exchange and correlation interactions. Ultrasoft pseudo potential was used to treated core electrons.<sup>9</sup> The Brillouin zones was performed by the Monkhorst-pack scheme sampled into  $4 \times 3 \times 5$  for  $\text{KCoPO}_4 \cdot \text{H}_2\text{O}$  and  $2 \times 3 \times 2$  for  $\text{KCoPO}_4$ . The force and energy convergence criteria were set to  $0.05 \text{ eV \AA}^{-1}$  and  $10^{-6} \text{ eV}$ , respectively.

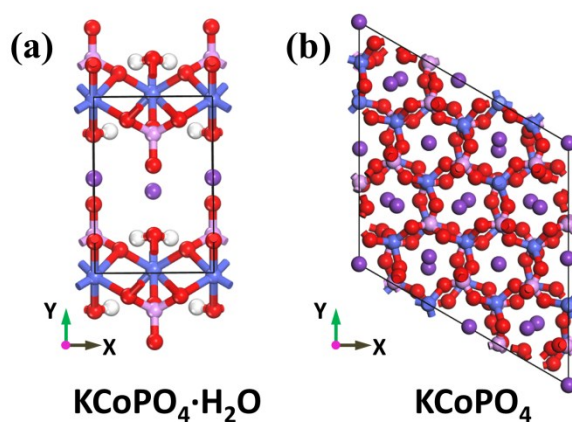

Fig. S1 Structural models of  $\text{KCoPO}_4 \cdot \text{H}_2\text{O}$  and  $\text{KCoPO}_4$ . (Blue, red, pink, purple and white balls represent Co, O, P, K and H atoms, respectively.)

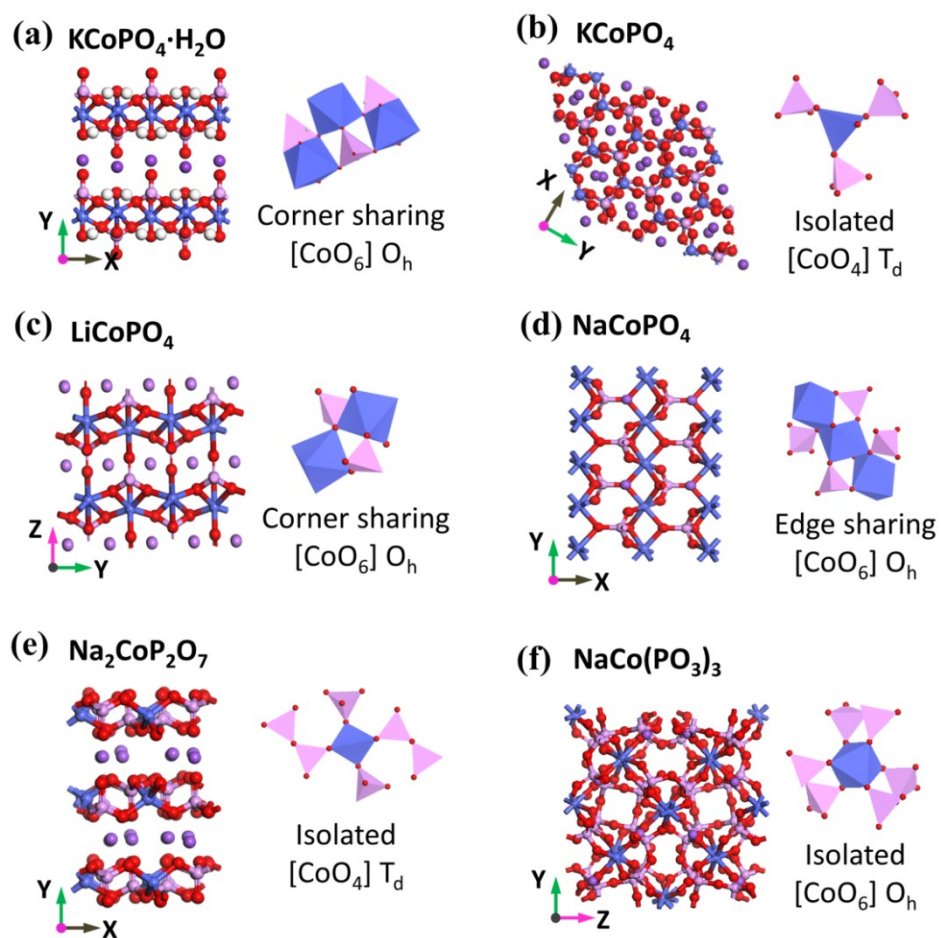

Fig. S2 Crystal structures of phosphate/pyrophosphate/metaphosphate-containing compounds with various cobalt (II) geometries including octahedral (Oh), tetrahedral (Td) and trigonal bipyramidal (TBP). The inset shows the local environment around the Co subunit (blue).

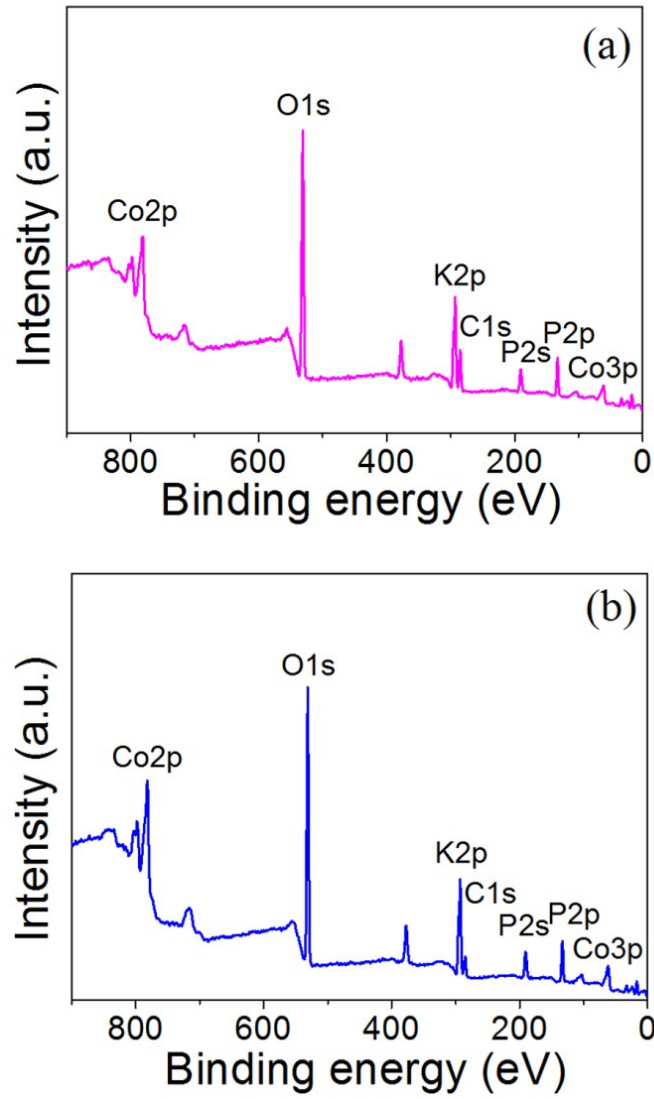

Fig. S3. Overall XPS spectra of the as-prepared (a)  $\text{KCoPO}_4 \cdot \text{H}_2\text{O}$ , and (b)  $\text{KCoPO}_4$ .

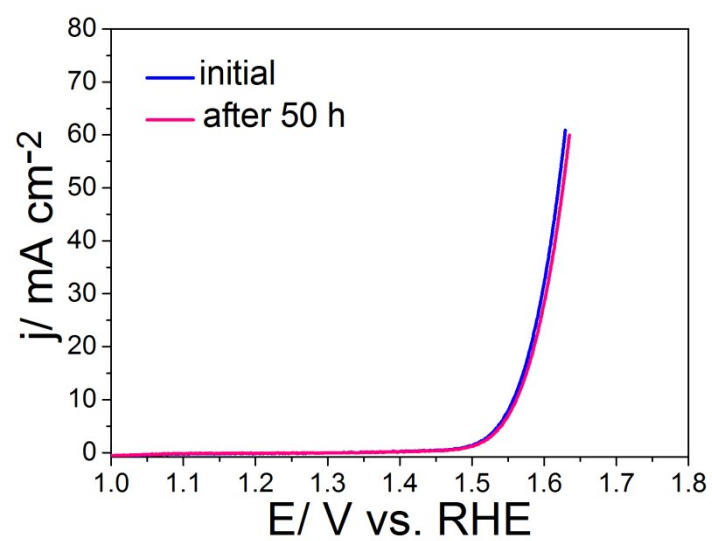

Fig. S4 LSV curve repeated after 50h test for KCoPO<sub>4</sub>.

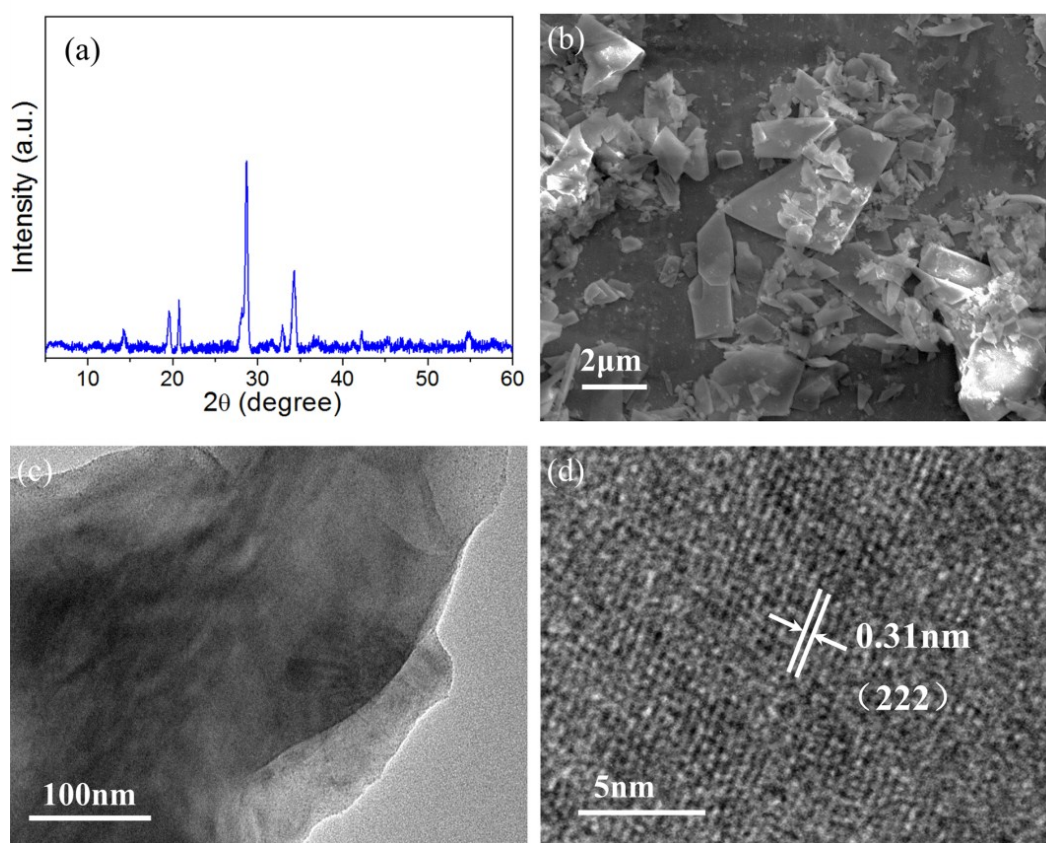

Fig. S5 Structural characterizations of  $\text{KCoPO}_4$  after the chronopotentiometry process.  
(a) XRD pattern, (b) SEM image, (c) TEM and HRTEM image.

**Table S1.** Fractional atomic coordinates for  $\text{KCoPO}_4 \cdot \text{H}_2\text{O}$ .

|     | x           | y           | z           |
|-----|-------------|-------------|-------------|
| H3  | 0.791910446 | 6.753781256 | 0.785989366 |
| O4  | 1.232976618 | 1.101077321 | 1.442646563 |
| K0  | 0           | 4.523386189 | 3.390965417 |
| Co1 | 0           | 8.253984906 | 2.855622607 |
| P2  | 0           | 1.789777434 | 0.759719193 |
| O5  | 0           | 1.515743558 | 4.086261412 |
| O6  | 0           | 3.280429984 | 1.021655982 |



**Table S2.** Fractional atomic coordinates for KCoPO<sub>4</sub>.

|     | x            | y           | z           |
|-----|--------------|-------------|-------------|
| K0  | -4.374973668 | 7.714302405 | 4.171254269 |
| K1  | -0.565032886 | 5.382062866 | 4.225838932 |
| K2  | -4.821926674 | 13.20606404 | 8.529327648 |
| Co6 | -6.20944342  | 10.8025184  | 2.595405653 |
| Co7 | -7.613667315 | 13.47752223 | 5.776165078 |
| Co8 | -1.698224711 | 8.255533953 | 1.497976989 |
| Co9 | -2.997098816 | 10.89944522 | 5.842207963 |
| P10 | -3.083113463 | 5.454512398 | 1.679079065 |
| P11 | -7.665382872 | 13.58519586 | 2.415834148 |
| P12 | -1.668277872 | 8.159163762 | 6.864655112 |
| P13 | -3.071069658 | 10.98031935 | 2.495403112 |
| O14 | -2.823724767 | 5.418956282 | 0.184367868 |
| O15 | -6.47674418  | 12.0578781  | 6.654946206 |
| O16 | -1.648942303 | 4.03344564  | 6.40898796  |
| O17 | -7.134713134 | 13.81044269 | 3.842060138 |
| O18 | -0.197626519 | 2.014663114 | 6.664096183 |
| O19 | -4.79312978  | 10.19811979 | 6.375250237 |
| O20 | -2.662272756 | 7.153225642 | 6.246338123 |
| O21 | -6.746364259 | 14.33562465 | 1.437107254 |
| O22 | -2.113577204 | 6.461135755 | 2.329512049 |
| O23 | -4.430083843 | 11.43619505 | 1.921992948 |
| O24 | -2.988198327 | 9.444072846 | 2.474782603 |
| O25 | -2.1179682   | 8.540745131 | 8.283312892 |
| O26 | -2.923979328 | 11.50392173 | 3.931333025 |
| O27 | -1.629013647 | 9.437538626 | 6.007687479 |
| O28 | -0.259264875 | 7.538145755 | 6.896511659 |
| O29 | -1.924402107 | 11.5559376  | 1.648022064 |
| K3  | 0            | 0           | 4.32261921  |
| K4  | 0            | 10.74411141 | 4.009722687 |
| K5  | 0            | 10.74411141 | 8.367098254 |

**Table S3.** OER activities of some recently reported transition-metal phosphate based electrocatalysts in alkaline aqueous electrolyte in terms of the overpotential to achieve a current density of 10 mA cm<sup>-2</sup>.

| Materials                                            | Overpotential (mV) | Electrolyte | Tafel slope (mV dec <sup>-1</sup> ) | Stability (h) | Reference |
|------------------------------------------------------|--------------------|-------------|-------------------------------------|---------------|-----------|
| KCoPO <sub>4</sub>                                   | 319                | 1.0 M KOH   | 61.8                                | 50            | This work |
| KCoPO <sub>4</sub> ·H <sub>2</sub> O                 | 387                | 1.0 M KOH   | 66.2                                | 10            | This work |
| CoHPi nanoflakes                                     | 314                | 1.0 M KOH   | 31                                  | 6.7           | 10        |
| Co <sub>3</sub> (PO <sub>4</sub> ) <sub>2</sub> /RGO | 405                | 1.0 M KOH   | 75                                  | 3             | 11        |
| Co <sub>3</sub> (PO <sub>4</sub> ) <sub>2</sub> @N-C | 317                | 1.0 M KOH   | 62                                  | 8             | 12        |
| NaCo(PO <sub>3</sub> ) <sub>3</sub>                  | 340                | 1.0 M KOH   | 76                                  | 12            | 13        |
| NiCoP/C                                              | 330                | 1.0 M KOH   | 96                                  | 10            | 14        |
| CoPi-HSNPC-800                                       | 320                | 1.0M KOH    | 85                                  | 20            | 15        |

## References

- [1] X. Lu, C. Zhao, *Nat. Commun.* 2015, 6, 6616.
- [2] M.D. Segall, P.J.D. Lindan, M.J. Probert, C.J. Pickard, P.J. Hasnip, S.J. Clark, M.C. Payne, *J. Phys.: Condens. Matter.* 14 (2002) 2717-2744.
- [3] P. Hohenberg, W. Kohn, *Phys. Rev.* 136 (1964) B864-B871.
- [4] W. Kohn, L.J. Sham, *Phys. Rev.* 140 (1965) A1133-A1138.
- [5] V.I. Anisimov, F. Lichtenstein, A.I. Lichtenstein, *J. Phys.: Condens. Matter.* 9 (1997) 767-808.
- [6] V.I. Anisimov, J. Zaanen, O.K. Andersen, *Phys. Rev. B* 44 (1991) 943-954.
- [7] X. Fu, B. Warot-Fonrose, R. Arras, D. Demaille, M. Eddrief, V. Etgens, V. Serin, *Appl. Phys. Lett.* 107 (2015) 062402-062406.
- [8] P.E. Blöchl, *Phys. Rev. B* 50(1994) 17953-17979.
- [9] D. Vanderbilt, *Phys. Rev. B* 41 (1990) 7892-7895.
- [10] J. Wang, H.C. Zeng, *ACS Appl. Mater. Interfaces* 10 (2018) 6288-6298.
- [11] Y. Zhan, S. Yang, M. Lu, Z. Liu, J.Y. Lee, *Electrochimica Acta* 227 (2017) 310-316.
- [12] C.Z. Yuan, Y.F. Jiang, Z. Wang, X. Xie, Z.K. Yang, A.B. Yousaf, A.W. Xu, *J. Mater. Chem. A* 4 (2016) 8155-8160.
- [13] R. Gond, D.K. Singh, M. Eswaramoorthy, P. Barpanda, *Angew. Chem.* 131 (2019) 8418-8423.
- [14] P.L. He, X.Y. Yu, X.W.D. Lou, *Angew. Chem.* 129 (2017) 1-5.
- [15] L. Chen, J.T. Ren, Y.S. Wang, W.W. Tian, L.J. Gao, Z.Y. Yuan, *ACS Sustainable Chem. Eng.* 7 (2019) 13559–13568.
